# Supplementary material for: Machine Learning and Structure-based Virtual Screening for Selecting Cinnamic Acid Derivatives as Leishmania major DHFR-TS Inhibitors
Source: Preprints.org preprint supplement (doi:10.20944/preprints202311.0097.v1), 2023-11-01
Supplement: Supplementary file 1 [file Supplementary_material.xlsx]

## Sheet: Table S1
Molecule	Name	SMILES	LB(AD)	LB(VS)	PSB	CA		True negative	VS	0.783
63	montamine	COC1=CC(\C=C\C(=O)N(CCC2=CNC3=CC=C(O)C=C23)N(CCC2=CNC3=CC=C(O)C=C23)C(=O)\C=C\C2=CC=C(O)C(OC)=C2)=CC=C1O	0.683	0.828	0.875757	0.780937			AD	0.825
242	6,8-di-C-B-glucopyranosylchrysin	[H]C1=CC=C(C=C1[H])C1=C([H])C(=O)C2=C(O1)C(OC[C@H]1O[C@@H](O)[C@H](O)[C@@H](O)[C@@H]1O)=C(O)C(OC[C@H]1O[C@@H](O)[C@H](O)[C@@H](O)[C@@H]1O)=C2O	0.524	0.86	0.927652	0.741608
96	4-O-Feruloyl 5-O-caffeoylquinic acid	COC1=C(O)C=CC(\C=C\C(=O)O[C@@H]2[C@H](O)C[C@](O)(C[C@H]2OC(=O)\C=C\C2=CC(O)=C(O)C=C2)C(O)=O)=C1	0.547	0.732	0.771625	0.66733
235	Apigenin 7-O-(6´´-caffeoyl)-glucoside	O[C@@H]1C(COC(=O)\C=C\C2=CC(O)=C(O)C=C2)O[C@@H](OC2=CC(O)=C3C(=O)C=C(OC3=C2)C2=CC=C(O)C=C2)C(O)[C@H]1O	0.699	0.474	0.882988	0.651867
241	lucenin-2 (6,8-di-C-B-glucopyranosylluteolin)	[H]C1=C(OC2=C(C1=O)C(O)=C(OC[C@H]1O[C@@H](O)[C@H](O)[C@@H](O)[C@@H]1O)C(O)=C2OC[C@H]1O[C@@H](O)[C@H](O)[C@@H](O)[C@@H]1O)C1=CC=C(O)C(O)=C1	0.528	0.551	1	0.63933
39	apigenin 7-O-rutinoside	C[C@@H]1O[C@@H](OC[C@H]2O[C@@H](OC3=CC(O)=C4C(=O)C=C(OC4=C3)C3=CC=C(O)C=C3)[C@H](O)[C@@H](O)[C@@H]2O)[C@H](O)[C@H](O)[C@H]1O	0.568	0.635	0.767598	0.63724
237	Lithospermic acid	OC(=O)[C@@H](CC1=CC(O)=C(O)C=C1)OC(=O)\C=C\C1=C2[C@@H]([C@H](OC2=C(O)C=C1)C1=CC(O)=C(O)C=C1)C(O)=O	0.61	0.547	0.839554	0.635439
306	diarctigenin	COC1=CC(C[C@@H]2[C@@H](CC3=CC(OC)=C(OC)C=C3)COC2=O)=CC(=C1O)C1=CC(C[C@H]2[C@H](CC3=CC(OC)=C(OC)C=C3)COC2=O)=CC(OC)=C1O	0.635	0.525	0.827413	0.634193
165	5-malonyl-1,3,4-tricaffeoylquinic acid	OC(=O)CC(=O)O[C@@H]1C[C@](C[C@@H](OC(=O)\C=C\C2=CC=C(O)C(O)=C2)[C@H]1OC(=O)\C=C\C1=CC(O)=C(O)C=C1)(OC(=O)\C=C\C1=CC(O)=C(O)C=C1)C(O)=O	0.531	0.597	0.884979	0.633356
140	Hesperidin	COC1=C(O)C=C(C=C1)C1CC(=O)C2=C(O)C=C(O[C@@H]3C[C@H](CO[C@@H]4C[C@@H](C)[C@H](O)[C@@H](O)[C@H]4O)[C@@H](O)[C@H](O)[C@H]3O)C=C2O1	0.594	0.511	0.913636	0.63125
308	Isolappaol A	[H][C@]1(CC2=CC=C(O)C(OC)=C2)COC(=O)[C@]1([H])CC1=CC(OC)=C2O[C@]([H])(C3=CC=C(O)C(OC)=C3)[C@@]([H])(CO)C2=C1	0.573	0.5879	0.814075	0.631082
20	3-Caffeoyl-5-p-coumaroylquinic acid	COC1=C(O)C=CC(\C=C\C(=O)O[C@@H]2C[C@@](O)(C[C@@H](OC(=O)\C=C\C3=CC(O)=C(O)C=C3)[C@H]2O)C(O)=O)=C1	0.53	0.641	0.791449	0.629688
164	1,3,5-tricaffeoylquinic acid	O[C@H]1[C@@H](C[C@](C[C@H]1OC(=O)C=CC1=CC(O)=C(O)C=C1)(OC(=O)C=CC1=CC(O)=C(O)C=C1)C(O)=O)OC(=O)C=CC1=CC(O)=C(O)C=C1	0.566	0.506	0.960441	0.628383
21	3,4,5-Tricaffeoylquinic acid	OC(=O)C1(O)C[C@@H](OC(=O)\C=C\C2=CC(O)=C(O)C=C2)C(OC(=O)\C=C\C2=CC(O)=C(O)C=C2)[C@@H](C1)OC(=O)\C=C\C1=CC(O)=C(O)C=C1	0.567	0.486	0.960122	0.620971
246	3-O-(6′′-O-(E)-p-coumaroyl)- B-glucopyranosylisorhamnetin	[H][C@]1(OC2=C(OC3=CC(O)=CC(O)=C3C2=O)C2=CC(OC)=C(O)C=C2)O[C@@H](COC(=O)\C=C\C2=CC=C(O)C=C2)[C@H](O)[C@@H](O)[C@@H]1O	0.636	0.502	0.797975	0.619301
314	prepicrasmalignan	COC1=CC(\C=C\C=O)=CC2=C1O[C@H]([C@@H]2CO)C1=CC([C@H](CO)[C@@H](O)C2=CC(OC)=C(O)C=C2)=C(O)C(OC)=C1	0.579	0.532	0.817697	0.612615
307	Lappaol A	[H][C@]1(CC2=CC3=C(O[C@]([H])(C4=CC(OC)=C(O)C=C4)[C@@]3([H])CO)C(OC)=C2)COC(=O)[C@]1([H])CC1=CC(OC)=C(O)C=C1	0.57	0.537	0.811054	0.609543
292	4-(3,4-dihydroxybenzyl)-2-(3,4-dihydroxyphenyl)tetrahydrofuran-3-carboxy-O-β-D-glucopyranosyl-2′-O-methacrylate	CC(=C)C(=O)OC[C@H]1O[C@@H](OC(=O)[C@H]2[C@@H](CC3=CC(O)=C(O)C=C3)CO[C@@H]2C2=CC(O)=C(O)C=C2)[C@H](O)[C@@H](O)[C@@H]1O	0.578	0.551	0.770418	0.60931
48	luteolin 7-O-rhamnoside	C[C@@H]1O[C@@H](O[C@@H]2[C@@H](O)[C@H](O)[C@@H](CO)O[C@H]2OC2=CC(O)=C3C(=O)C=C(OC3=C2)C2=CC(O)=C(O)C=C2)[C@H](O)[C@H](O)[C@H]1O	0.565	0.525	0.813514	0.603454
213	Yunnaneic acid F	OC(=O)[C@@H](CC1=CC(O)=C(O)C=C1)OC(=O)\C=C\C1=C[C@@H]2[C@@H]([C@H]([C@H]1[C@]1(O)OC(=O)C[C@]21O)C(O)=O)C1=CC(O)=C(O)C=C1	0.533	0.512	0.866429	0.597233
312	prebalanophonin	COC1=CC(\C=C\C=O)=CC([C@@H](CO)[C@H](O)C2=CC(OC)=C(O)C=C2)=C1O	0.476	0.765	0.516227	0.596554
206	3-[10-Acetoxygeranyl]-4-acetoxy-p-coumaric acid	CC(C)=CCC\C(COC(C)=O)=C\CC1=CC(\C=C\C(O)=O)=CC=C1OC(C)=O	0.501	0.681	0.616754	0.595769
232	apigenin 7-o-neohesperidoside	CC1OC(OC2C(O)C(O)C(CO)OC2OC2=CC(O)=C3C(=O)C=C(OC3=C2)C2=CC=C(O)C=C2)C(O)C(O)C1O	0.565	0.51	0.783155	0.591061
305	Dihydrocubebin	OC[C@H](CC1=CC2=C(OCO2)C=C1)[C@H](CO)CC1=CC2=C(OCO2)C=C1	0.422	0.769	0.576505	0.589796
146	bartericin A	CC(C)=CCC1=C(O)C=CC(\C=C\C(=O)C2=CC(CC(O)C(C)=C)=C(O)C=C2O)=C1	0.564	0.609	0.576021	0.584021
157	7-Hydroxycoumarin glucuronide	O[C@@H]1[C@@H](O)[C@H](OC2=CC3=C(C=CC(=O)O3)C=C2)O[C@@H]([C@H]1O)C(O)=O	0.51	0.704	0.50346	0.583646
252	isovitexin-2′′-O-xyloside	OCC1O[C@H](C(O[C@@H]2OC[C@@H](O)[C@H](O)C2O)[C@@H](O)[C@@H]1O)C1=C(O)C2=C(OC(=CC2=O)C2=CC=C(O)C=C2)C=C1O	0.544	0.553	0.684303	0.57793
89	3,5-di-O-caffeoylquinic acid	OC1[C@H](CC(O)(C[C@@H]1OC(=O)\C=C\C1=CC(O)=C(O)C=C1)C(O)=O)OC(=O)\C=C\C1=CC(O)=C(O)C=C1	0.547	0.495	0.781996	0.577877
187	arctiin	[H]C1=C(OO[C@@H]2O[C@H](CO)[C@@H](O)[C@H](O)[C@H]2O)C(OC)=CC(C[C@]2([H])C(=O)OC[C@@]2([H])CC2=CC(OC)=C(OC)C=C2)=C1	0.573	0.493	0.737107	0.577659
43	luteolin 4´-O-glucoside	OC[C@H]1O[C@@H](OC2=C(O)C=C(C=C2)C2=CC(=O)C3=C(O)C=C(O)C=C3O2)[C@H](O)[C@@H](O)[C@@H]1O	0.504	0.62	0.634661	0.57724
195	p-Coumaroyl-O-caffeoylquinic acid	O[C@@H]1C[C@](O)(C[C@@H](OC(=O)\C=C\C2=CC=C(O)C=C2)[C@@H]1OC(=O)\C=C\C1=CC=C(O)C(O)=C1)C(O)=O	0.55	0.532	0.705284	0.576734
283	pinoresinol-1-yl- d-glucopyranoside	OC[C@H]1O[C@@H](OC(=O)C2=CC3=C(O2)C=CC(O[C@@H]2O[C@H](CO)[C@@H](O)[C@H](O)[C@H]2O)=C3CCC2=CC=C(O)C=C2)[C@H](O)[C@@H](O)[C@@H]1O	0.562	0.407	0.904787	0.576414
313	picrasmalignan	COC1=CC(\C=C\C=O)=CC2=C1O[C@H]([C@@H]2CO)C1=CC2=C(O[C@@H]([C@H]2CO)C2=CC(OC)=C(O)C=C2)C(OC)=C1	0.553	0.532	0.695111	0.575714
94	3,4-O-Caffeoylquinic acid	O[C@@H]1C[C@](O)(C[C@@H](OC(=O)\C=C\C2=CC(O)=C(O)C=C2)[C@@H]1OC(=O)\C=C\C1=CC(O)=C(O)C=C1)C(O)=O	0.543	0.491	0.786343	0.575688
52	isoetin 4´-O-glucuronide	OC1C(O)[C@H](OC2=C(O)C=C(C(O)=C2)C2=CC(=O)C3=C(O)C=C(O)C=C3O2)O[C@@H]([C@H]1O)C(O)=O	0.516	0.595	0.648293	0.575277
150	3-O-betulinic acid-p-coumarate	[H][C@]12C[C@@H](C[C@@]1(CC[C@]1(C)C2CCC2[C@@]3(C)CC[C@H](OC(=O)\C=C\C4=CC=C(O)C=C4)C(C)(C)C3CC[C@@]12C)[O]=[OH])C(C)=C	0.651	0.528	0.518629	0.574681
17	4,5-Dicaffeoylquinic acid	O[C@@H]1C[C@@](O)(C[C@@H](OC(=O)\C=C\C2=CC(O)=C(O)C=C2)[C@H]1OC(=O)\C=C\C1=CC(O)=C(O)C=C1)C(O)=O	0.543	0.508	0.746714	0.573666
61	moschamine	COC1=C(O)C=CC(\C=C\C(=O)NCCC2=CNC3=C2C=C(O)C=C3)=C1	0.597	0.561	0.549453	0.572752
233	luteolin-3' 7-di-o-glucoside	OC[C@H]1O[C@@H](OC2=CC(O)=C3C(=O)C=C(OC3=C2)C2=CC(O[C@@H]3O[C@H](CO)[C@@H](O)[C@H](O)[C@H]3O)=C(O)C=C2)[C@H](O)[C@@H](O)[C@@H]1O	0.549	0.462	0.813452	0.572726
16	1,3-Dicaffeoylquinic acid	OC1[C@@H](CC(O)(C[C@H]1OC(=O)\C=C\C1=CC(O)=C(O)C=C1)C(O)=O)OC(=O)\C=C\C1=CC(O)=C(O)C=C1	0.547	0.498	0.750767	0.57226
204	4´-geranyloxyisoliquiritigenin	CC(=C)CCC\C(C)=C\COC1=CC=C(C(=O)\C=C\C2=CC=C(O)C=C2)C(O)=C1	0.614	0.555	0.525919	0.572056
6	trans-3,5-O-dicaffeoylquinic acid	O[C@H]1[C@@H](C[C@](O)(C[C@H]1OC(=O)C=CC1=CC(O)=CC(O)=C1)C(O)=O)OC(=O)C=CC1=CC(O)=C(O)C=C1	0.539	0.466	0.813988	0.57043
44	luteolin 4´-O-glucuronide	O[C@H]1COC(OC2=CC=C(C=C2O)C2=CC(=O)C3=C(O)C=C(O)C=C3O2)[C@H](O)[C@H]1O	0.515	0.611	0.587786	0.567941
42	luteolin 4´-O-arabinoside	O[C@H]1CO[C@@H](OC2=CC=C(C=C2O)C2=CC(=O)C3=C(O)C=C(O)C=C3O2)[C@H](O)[C@H]1O	0.515	0.611	0.587316	0.567839
35	apigenin 4´-O-glucuronide	[H]OC1=CC(O)=C2C(=O)C=C(OC2=C1)C1=CC=C(O[C@@H]2O[C@@H]([C@@H](O)[C@H](O)[C@H]2O)C(O)=O)C=C1	0.507	0.625	0.567829	0.565859
282	okanin 4´-O-(6-O-malonyl-B-glucopyranoside	O[C@@H]1[C@@H](COC(=O)CC(O)=O)O[C@@H](OC2=C(O)C(O)=C(C=C2)C(=O)\C=C\C2=CC=C(O)C(O)=C2)[C@H](O)[C@H]1O	0.539	0.478	0.767884	0.565068
27	4-hydroxy-E-cinnamomic acid 4-B-D-glucopyranosyloxybenzyl ester	OC[C@@H]1OC(OCC(=O)OC2=CC=C(COC(=O)\C=C\C3=CC=C(O)C=C3)C=C2)[C@@H](O)[C@H](O)[C@H]1O	0.562	0.49	0.703819	0.564917
192	moschamine	[H]N(CCC1=CN([H])C2=CC=C(O)C=C12)C(=O)\C=C\C1=CC=C(O)C(OC)=C1	0.597	0.534	0.55886	0.564346
243	3,4-di-O-(E)-feruloylquinic acid	COC1=C(O)C=CC(\C=C\C(=O)OC2C[C@](O)(CC(O)[C@@H]2OC(=O)\C=C\C2=CC(OC)=C(O)C=C2)C(O)=O)=C1	0.547	0.454	0.783709	0.562384
155	Tiliroside	O[C@@H]1[C@@H](COC(=O)\C=C\C2=CC=C(O)C=C2)O[C@@H](OC2=C(OC3=CC(O)=CC(O)=C3C2=O)C2=CC=C(O)C=C2)[C@H](O)[C@H]1O	0.631	0.383	0.756482	0.562271
62	cis-moschamine	COC1=C(O)C=CC(\C=C/C(=O)NCCC2=CNC3=C2C=C(O)C=C3)=C1	0.597	0.519	0.562211	0.559269
19	3-Caffeoyl-4-p-coumaroylquinic acid	COC1=C(O)C=CC(\C=C/C(=O)OC2C(O)CC(O)(CC2OC(=O)\C=C/C2=CC(O)=C(O)C=C2)C(O)=O)=C1	0.547	0.414	0.837818	0.558649
34	apigenin 4´-O-glucoside	OC[C@H]1O[C@@H](OC2=CC=C(C=C2)C2=CC(=O)C3=C(O)C=C(O)C=C3O2)[C@H](O)[C@@H](O)[C@@H]1O	0.499	0.627	0.544227	0.558343
87	butein 4'-O-glucopyranosyl	[H]\C(=C/C1=CC(O)=C(O)C=C1)C(=O)C1=CC=C(O[C@H]2O[C@@H](CO)[C@H](O)[C@@H](O)[C@@H]2O)C=C1O	0.59	0.512	0.581444	0.557962
251	kaempferol-3-O-rutinoside	C[C@@H]1O[C@@H](OC[C@H]2O[C@@H](OC3=C(OC4=CC(O)=CC(O)=C4C3=O)C3=CC=C(O)C=C3)[C@H](O)[C@@H](O)[C@@H]2O)[C@H](O)[C@H](O)[C@H]1O	0.56	0.445	0.74136	0.55486
67	(E) N-(4-hydroxycinnamoyl)-5-methoxytryptamine	[H]C1=CC(\C=C\C(=O)NCCC2=CNC3=CC=C(OC)C=C23)=CC=C1O	0.644	0.495	0.496792	0.5544
257	3-[4′-acetoxyprenyl]-5-[4″- hydroxyprenyl]-7(Z)-p-coumaric acid	CC(=O)OC\C(C)=C/CC1=C(O)C(C\C=C(\C)CO)=CC(\C=C/C(O)=O)=C1	0.409	0.695	0.56313	0.553112
97	4-Caffeoyl-5-feruloylquinic acid	COC1=C(O)C=CC(\C=C\C(=O)O[C@@H]2C[C@@](O)(C[C@@H](O)[C@H]2OC(=O)\C=C\C2=CC(O)=C(O)C=C2)C(O)=O)=C1	0.546	0.403	0.827137	0.551679
47	luteolin 7-O-glucuronide	O[C@@H]1[C@@H](O)[C@H](OC2=CC(O)=C3C(=O)C=C(OC3=C2)C2=CC(O)=C(O)C=C2)O[C@@H]([C@H]1O)C(O)=O	0.517	0.534	0.643441	0.551017
166	Apigenin acetyl glycoside	CC(=O)OC1C(O)C(O)C(CO)OC1OC1=CC(O)=C2C(=O)C=C(OC2=C1)C1=CC=C(O)C=C1	0.54	0.528	0.610147	0.55058
309	cartamoside	COC1=C(OC)C=C(C[C@H]2COC(=O)[C@]2(O)CC2=CC(OC)=C(O[C@@H]3O[C@H](CO)[C@@H](O)[C@H](O)[C@H]3O)C=C2)C=C1	0.551	0.374	0.862949	0.55021
37	apigenin 7-O-arabinoside	O[C@@H]1[C@@H](O)[C@H](OC2=CC(O)=C3C(=O)C=C(OC3=C2)C2=CC=C(O)C=C2)O[C@@H]([C@H]1O)C(O)=O	0.517	0.554	0.603756	0.550144
203	p-hydroxycordoin	[H]CC(C)=CCOC1=CC=C(C(=O)\C=C\C2=CC=C(O)C=C2)C(O)=C1	0.584	0.576	0.435752	0.548733
186	Quercetagetin-methyl ether-O-hexcoside	OC[C@H]1O[C@@H](OC2=CC3=C(C(O)=C2O)C(=O)C(O)=C(O3)C2=CC(O)=C(O)C=C2)[C@H](O)[C@@H](O)[C@@H]1O	0.533	0.5	0.664043	0.548669
49	luteolin 7-O-rutinoside	OC[C@H]1O[C@@H](OC[C@H]2OC(OC3=CC(O)=C4C(=O)C=C(OC4=C3)C3=CC(O)=C(O)C=C3)[C@H](O)[C@@H](O)[C@@H]2O)[C@H](O)C(O)[C@H]1O	0.555	0.373	0.8491	0.548401
147	stipulin	CC(C)=CCC1=CC(\C=C\C(=O)C2=C(O)C=C(O)C(CC=C(C)C)=C2)=CC=C1O	0.568	0.507	0.580139	0.547031
68	(Z) N-(4-hydroxycinnamoyl)-5-methoxytryptamine	[H]C1=CC(\C=C/C(=O)NCCC2=CNC3=CC=C(OC)C=C23)=CC=C1O	0.644	0.459	0.517805	0.545031
253	platyphylloside	OC[C@H]1O[C@@H](O[C@@H](CCC2=CC=C(O)C=C2)CC(=O)CCC2=CC=C(O)C=C2)[C@H](O)[C@@H](O)[C@@H]1O	0.517	0.482	0.708372	0.544988
28	4-hydroxy-Z-cinnamomic acid 4-B-D-glucopyranosyloxybenzyl ester	OC[C@@H]1OC(OCC(=O)OC2=CC=C(COC(=O)\C=C/C3=CC=C(O)C=C3)C=C2)[C@@H](O)[C@H](O)[C@H]1O	0.562	0.46	0.66482	0.544846
250	isovitexin-4′-O-glucoside	OC[C@H]1O[C@@H](O[C@H]2[C@H](O)[C@@H](O)[C@@H](O[C@@H]2CO)C2=C(O)C=C(O)C3=C2OC(=CC3=O)C2=CC=C(O)C=C2)[C@H](O)[C@@H](O)[C@@H]1O	0.541	0.403	0.803987	0.544675
71	5,7-Dihydroxy-4´-methoxyflavone (acacetin)	COC1=CC=C(C=C1)C1=CC(=O)C2=C(O1)C=C(O)C([C@@H]1OC(CO)[C@@H](O)[C@H](O)C1O)=C2O	0.512	0.646	0.417287	0.543295
103	(E)-2-hydroxy-3',6'-dimethoxychalcone	COC1=CC(C(=O)\C=C\C2=CC=CC=C2O)=C(OC)C=C1	0.713	0.469	0.362769	0.542583
291	4-(3,4-dihydroxybenzyl)-2-(3,4-dihydroxyphenyl)tetrahydrofuran-3-carboxy-O-β-D-glucopyranoside	OC[C@H]1O[C@@H](OC(=O)[C@H]2[C@@H](CC3=CC(O)=C(O)C=C3)CO[C@@H]2C2=CC(O)=C(O)C=C2)[C@H](O)[C@@H](O)[C@@H]1O	0.502	0.435	0.807918	0.542464
208	rosmarinic acid	OC(=O)C(CC1=CC=C(O)C(O)=C1)OC(=O)\C=C\C1=CC=C(O)C(O)=C1	0.541	0.525	0.574424	0.542062
234	Apigenin 7-O-(6´´-malonyl)-glucoside	O[C@H]1[C@H](O)[C@@H](COC(=O)CC(O)=O)O[C@@H](OC2=CC(O)=C3C(=O)C=C(OC3=C2)C2=CC=C(O)C=C2)[C@@H]1O	0.516	0.438	0.766854	0.540258
84	Butein chalcona	OC1=CC(O)=C(C=C1)C(=O)\C=C\C1=CC(O)=C(O)C=C1	0.581	0.573	0.403182	0.539316
51	isoetin 4´-O-glucoside	OCC1O[C@@H](OC2=C(O)C=C(C(O)=C2)C2=CC(=O)C3=C(O)C=C(O)C=C3O2)C(O)[C@@H](O)[C@@H]1O	0.523	0.574	0.506937	0.539248
194	Quercetagetin-O-acetyl hexoside	CC(=O)OC[C@H]1O[C@@H](OC2=C(OC3=CC(O)=CC(O)=C3C2=O)C2=CC(O)=C(O)C=C2)[C@H](O)[C@@H](O)[C@@H]1O	0.497	0.541	0.610131	0.538576
171	4-Acetyl-3-prenyl-p-coumaric acid	[H]C1=C(OC(C)=C)C(CC=C(C)C)=CC(\C=C\C(O)=O)=C1	0.468	0.643	0.479836	0.538282
221	Vicenin	OC[C@H]1O[C@H]([C@H](O)[C@@H](O)[C@@H]1O)C1=C(O)C([C@@H]2O[C@H](CO)[C@@H](O)[C@H](O)[C@H]2O)=C2OC(=CC(=O)C2=C1O)C1=CC=C(O)C=C1	0.525	0.488	0.648361	0.537454
281	Bidenoside G	CC(=O)OC[C@H]1O[C@@H](OC2=CC(O)=C(C=C2)C(=O)\C=C\C2=CC=C(O)C(O)=C2)[C@H](O)[C@@H](O)[C@@H]1O	0.566	0.451	0.638024	0.537133
145	specicoside	OC[C@@H]1O[C@@H](O[C@H]2OC=CC3[C@@H](OC(=O)\C=C\C4=CC=C(O)C=C4)[C@H]4O[C@@]4(CO)C23)[C@@H](O)[C@H](O)[C@@H]1O	0.474	0.493	0.730992	0.537123
18	1-Caffeoyl-3-feruloylquinic acid	COC1=C(O)C=CC(\C=C\C(=O)O[C@@H]2C[C@@](C[C@@H](O)[C@@H]2O)(OC(=O)\C=C\C2=CC=C(O)C(O)=C2)C(O)=O)=C1	0.549	0.409	0.741275	0.536555
224	Dihydromyricetin	O[C@@H]1[C@H](OC2=CC(O)=CC(O)=C2C1=O)C1=CC(O)=C(O)C(O)=C1	0.481	0.626	0.477985	0.536451
285	(7R,8S)-dihydrodehydrodiconiferyl alcohol 9-O-beta-D-glucopyranoside	COC1=CC(CCCO)=CC2=C1O[C@@H]([C@H]2CO[C@@H]1O[C@H](CO)[C@@H](O)[C@H](O)[C@H]1O)C1=CC(OC)=C(O)C=C1	0.463	0.418	0.879915	0.536064
38	apigenin 7-O-glucoside	OC[C@H]1O[C@@H](OC2=CC(O)=C3C(=O)C=C(OC3=C2)C2=CC=C(O)C=C2)[C@H](O)[C@@H](O)[C@@H]1O	0.505	0.546	0.57441	0.535927
66	cis-centcyamine	COC1=CC2=C(NC=C2CCNC(=O)\C=C/C2=CC=C(O)C=C2)C=C1	0.644	0.459	0.475629	0.535878
188	matairesinoside	[H]C1=C(OO[C@@H]2O[C@H](CO)[C@@H](O)[C@H](O)[C@H]2O)C(OC)=CC(C[C@]2([H])C(=O)OC[C@@]2([H])CC2=CC(OC)=C(O)C=C2)=C1	0.578	0.335	0.815505	0.535517
53	isoetin 7-O-glucoside	OCC1O[C@@H](OC2=CC(O)=C3C(=O)C=C(OC3=C2)C2=CC(O)=C(O)C=C2O)C(O)[C@@H](O)[C@@H]1O	0.528	0.524	0.56312	0.534074
174	4-Acetyl-3,5-diprenylcinnamic acid	CC(C)=CCC1=CC(\C=C\C(O)=O)=CC(CC=C(C)C)=C1OC(C)=C	0.48	0.544	0.614641	0.533983
46	luteolin 7-O-arabinoside	OC[C@H]1O[C@@H](OC2=CC(O)=C3C(=O)C=C(OC3=C2)C2=CC=C(O)C(O)=C2)[C@H](O)C1O	0.494	0.584	0.513258	0.533003
83	Rutin	C[C@@H]1O[C@@H](OC[C@H]2O[C@@H](OC3=C(OC4=CC(O)=CC(O)=C4C3=O)C3=CC(O)=C(O)C=C3)[C@H](O)[C@@H](O)[C@@H]2O)[C@H](O)[C@H](O)[C@H]1O	0.539	0.372	0.79554	0.530055
267	quercetin-3-O-β-galactoside	[H][C@@]1(CO)O[C@]([H])(OC2=C(OC3=C(C(O)=CC(O)=C3)C2=O)C2=CC=C(O)C(O)=C2)[C@@]([H])(O)[C@]([H])(O)[C@]1([H])O	0.487	0.526	0.608718	0.528505
227	quercitrin	C[C@@H]1O[C@@H](OC2=C(OC3=CC(O)=CC(O)=C3C2=O)C2=CC(O)=C(O)C=C2)[C@H](O)[C@@H](O)[C@H]1O	0.481	0.554	0.56022	0.526438
8	(-) L-chicoric acid	OC(=O)C(OC(=O)C=CC1=CC(O)=C(O)C=C1)C(OC(=O)C=CC1=CC(O)=C(O)C=C1)C(O)=O	0.499	0.419	0.738469	0.520013
151	luteolin-7-O-glucoside	[H]C1=C(O[C@@H]2O[C@H](CO)[C@@H](O)[C@H](O)[C@H]2O)C=C2OC(=C([H])C(=O)C2=C1O)C1=CC=C(O)C(O)=C1	0.501	0.492	0.599085	0.518803
239	Bonducillin	COC1=CC=C(\C=C2/COC3=C(C=CC(O)=C3)C2=O)C=C1	0.603	0.519	0.364621	0.518766
279	3,5-dihydroxy_x0002_6,7,8,3´,4´,5´-hexamethoxyflavone	OC1=CC(=CC(O)=C1O)C1=C(O)C(=O)C2=C(O)C(O)=C(O)C(O)=C2O1	0.477	0.532	0.56952	0.51836
30	skimmin	OC[C@H]1O[C@@H](OC2=CC3=C(C=CC(=O)O3)C=C2)[C@H](O)[C@@H](O)[C@@H]1O	0.496	0.559	0.481987	0.517336
225	Baicalin	O[C@@H]1[C@@H](O)[C@H](OC2=C(O)C(O)=C3C(=O)C=C(OC3=C2)C2=CC=CC=C2)O[C@@H]([C@H]1O)C(O)=O	0.522	0.466	0.592976	0.515734
280	chalconaringenin	OC1=CC=C(\C=C\C(=O)C2=C(O)C=C(O)C=C2O)C=C1	0.583	0.534	0.349722	0.513416
156	Quercetin 3-O-(6-O-malonyl)-β-D-glucoside	O[C@H]1[C@H](O)[C@@H](COC(=O)CC(O)=O)O[C@@H](OC2=C(OC3=CC(O)=CC(O)=C3C2=O)C2=CC(O)=C(O)C=C2)[C@@H]1O	0.497	0.435	0.679022	0.512511
193	N-(p-coumaroyl)-serotonin	[H]N(CCC1=CN([H])C2=CC=C(O)C=C12)C(=O)\C=C\C1=CC=C(O)C([H])=C1	0.607	0.435	0.469954	0.510706
258	Guayulin-A	C\C1=C/C2C(C(C\C(C)=C\CC1)OC(=O)\C=C\C1=CC=CC=C1)C2(C)C	0.526	0.496	0.502465	0.509284
161	Apigenin-8-C-glycoside	C[Si](C)(C)OCC1OC(C(O[Si](C)(C)C)C(O[Si](C)(C)C)C1O[Si](C)(C)C)C1=C(O[Si](C)(C)C)C=C(O[Si](C)(C)C)C2=C1OC(=CC2=O)C1=CC=C(O[Si](C)(C)C)C=C1	0.516	0.428	0.634724	0.507714
284	sesamin	C1OC2=C(O1)C=C(C=C2)[C@H]1OC[C@H]2[C@@H]1CO[C@@H]2C1=CC2=C(OCO2)C=C1	0.398	0.617	0.50059	0.505002
163	Coumaroyltartaric acid	OC(C(O)C(=O)OC(=O)\C=C\C1=CC=C(O)C=C1)C(O)=O	0.492	0.518	0.500714	0.503951
247	5-Caffeoylshikimic acid	[H]\C(=C(\[H])C1=CC(O)=C(O)C=C1)C(=O)O[C@@H]1CC(=C[C@@H](O)[C@H]1O)C(O)=O	0.509	0.492	0.514669	0.503652
31	cichoriin	OC[C@H]1O[C@@H](OC2=C(O)C=C3C=CC(=O)OC3=C2)[C@H](O)[C@@H](O)[C@@H]1O	0.487	0.521	0.49674	0.50227
154	Kaempferol-3-O-glucopyranoside	OC[C@@H]1O[C@@H](OC2=C(OC3=CC(O)=CC(O)=C3C2=O)C2=CC=C(O)C=C2)[C@@H](O)[C@H](O)[C@H]1O	0.502	0.467	0.564793	0.502084
199	Hesperetin	COC1=C(O)C=C(C=C1)[C@@H]1CC(=O)C2=C(O)C=C(O)C=C2O1	0.503	0.527	0.444039	0.499491
10	D-Chicoric acid	OC(=O)[C@@H](OC(=O)\C=C\C1=CC(O)=C(O)C=C1)[C@H](OC(=O)\C=C\C1=CC(O)=C(O)C=C1)C(O)=O	0.499	0.442	0.599475	0.498749
248	4-Caffeoylshikimic acid	O[C@@H]1CC(=C[C@@H](O)[C@H]1OC(=O)\C=C\C1=CC(O)=C(O)C=C1)C(O)=O	0.504	0.477	0.526032	0.498334
202	Cordoin	[H]CC(C)=CCOC1=CC=C(C(=O)\C=C\C2=CC=C([H])C=C2)C(O)=C1	0.644	0.412	0.38498	0.49802
197	Taxifoline-O-pentoside	[H]C1(COC([H])(O)C([H])(O)C1O)OC1C(OC2=C(C(O)=CC(O)=C2)C1=O)C1=CC(O)=C(O)C=C1	0.476	0.432	0.655865	0.498008
139	Hyperoside	OC[C@@H]1OC(OC2=C(OC3=CC(O)=CC(O)=C3C2=O)C2=CC=C(O)C(O)=C2)[C@@H](O)[C@H](O)[C@@H]1O	0.487	0.44	0.61909	0.497479
222	Salipurposid	OC[C@H]1O[C@@H](OC2=CC(O)=CC3=C2C(=O)CC(O3)C2=CC=C(O)C=C2)[C@H](O)[C@@H](O)[C@@H]1O	0.465	0.533	0.490213	0.496783
256	3-[4′-acetoxyprenyl]-5-[4″-hydroxyprenyl]-7(E)-p-coumaric acid	CC(=O)OC\C(C)=C/CC1=C(O)C(C\C=C(\C)CO)=CC(\C=C\C(O)=O)=C1	0.409	0.509	0.631927	0.496072
185	taxifoline-O-pentoside	C[C@H]1[C@H](C)[C@H](OC2=C(O)C=CC(=C2)[C@H]2OC3=C(C(O)=CC(O)=C3)C(=O)[C@@H]2O)O[C@@H]1CO	0.455	0.471	0.613727	0.495637
143	vitexin	OC[C@H]1O[C@H]([C@H](O)[C@@H](O)[C@@H]1O)C1=C(O)C=C(O)C2=C1OC(=CC2=O)C1=CC=C(O)C=C1	0.507	0.451	0.54675	0.493958
142	homoorientin	OC[C@H]1O[C@H]([C@H](O)[C@@H](O)[C@@H]1O)C1=C(O)C2=C(OC(=CC2=O)C2=CC(O)=C(O)C=C2)C=C1O	0.522	0.48	0.466997	0.493812
23	Caffeoyltartaric acid	O[C@H]([C@@H](OC(=O)\C=C\C1=CC(O)=C(O)C=C1)C(O)=O)C(O)=O	0.54	0.419	0.542236	0.493666
141	orientin	OC[C@H]1O[C@H]([C@H](O)[C@@H](O)[C@@H]1O)C1=C(O)C=C(O)C2=C1OC(=CC2=O)C1=CC(O)=C(O)C=C1	0.515	0.413	0.593842	0.492642
201	Quercetin-di-methyl ether	COC1=C(O)C=CC(=C1)C1=C(OC)C(=O)C2=C(O)C=C(O)C=C2O1	0.356	0.671	0.423188	0.492465
238	melacacidin	O[C@@H]1[C@H](O)C2=C(O[C@@H]1C1=CC(O)=C(O)C=C1)C(O)=C(O)C=C2	0.453	0.546	0.468229	0.49229
92	7-O-B-D-Glucopyranosyl- nutanocoumarin	C[C@H]1OC2=C(C(=O)OC3=CC(O[C@@H]4O[C@H](CO)[C@@H](O)[C@H](O)[C@H]4O)=CC(C)=C23)[C@]1(C)CC\C=C(\C)CO	0.469	0.404	0.691283	0.492088
5	trans-5-O-caffeoylquinic acid	O[C@@H]1C[C@@](O)(C[C@@H](OC(=O)\C=C\C2=CC(O)=C(O)C=C2)[C@H]1O)C(O)=O	0.47	0.48	0.550985	0.491444
7	caftaric acid	O[C@H]([C@@H](OC(=O)\C=C\C1=CC=C(O)C(O)=C1)C(O)=O)C(O)=O	0.54	0.426	0.513101	0.490052
158	artepillin C	CC(C)=CCC1=CC(\C=C\C(C)=O)=CC(CC=C(C)C)=C1O	0.465	0.499	0.51901	0.489877
22	Caffeoylshikimic acid	O[C@@H]1C=C(C[C@@H](OC(=O)\C=C\C2=CC(O)=C(O)C=C2)[C@@H]1O)C(O)=O	0.509	0.491	0.44881	0.488973
57	quercetin 3-O-glucoside (isoquercetin)	OC[C@H]1O[C@@H](OC2=C(OC3=CC(O)=CC(O)=C3C2=O)C2=CC(O)=C(O)C=C2)[C@H](O)[C@@H](O)[C@@H]1O	0.487	0.43	0.591062	0.487528
226	glycoside guaijaverin	O[C@H]1CO[C@@H](OC2=C(OC3=CC(O)=CC(O)=C3C2=O)C2=CC(O)=C(O)C=C2)[C@H](O)[C@H]1O	0.479	0.453	0.562463	0.487052
266	tamarixetin-3-O_x0002_β-galactoside	[H][C@@]1(CO)O[C@]([H])(OC2=C(OC3=C(C(O)=CC(O)=C3)C2=O)C2=CC=C(OC)C(O)=C2)[C@@]([H])(O)[C@](C)(O)[C@]1([H])O	0.483	0.441	0.571721	0.486002
255	capillartemisin B	CC(C)=CCC1=C(O)C(C\C=C(\C)CO)=CC(\C=C\C(O)=O)=C1	0.361	0.572	0.55986	0.485799
207	N-di-p-coumaroylputrescine	OC1=CC=C(\C=C/C(=O)NCCCCNC(=O)\C=C/C2=CC=C(O)C=C2)C=C1	0.493	0.477	0.488212	0.48577
144	isoschaftoside	OC[C@H]1O[C@H]([C@H](O)[C@@H](O)[C@@H]1O)C1=C2OC(=CC(=O)C2=C(O)C([C@@H]2OC[C@H](O)[C@H](O)[C@H]2O)=C1O)C1=CC=C(O)C=C1	0.535	0.393	0.556297	0.484677
9	Chlorogenic acid	O[C@@H]1C[C@](O)(C[C@@H](OC(=O)\C=C\C2=CC(O)=C(O)C=C2)[C@@H]1O)C(O)=O	0.47	0.489	0.503497	0.484621
160	isosakuranetin	COC1=CC=C(C=C1)[C@@H]1CC(=O)C2=C(O)C=C(O)C=C2O1	0.459	0.539	0.434061	0.484543
311	Balanophonin	COC1=CC(\C=C\C=O)=CC2=C1O[C@@H]([C@H]2CO)C1=CC(OC)=C(O)C=C1	0.435	0.51	0.528597	0.484332
304	Hinoquinin	O=C1OC[C@H](CC2=CC3=C(OCO3)C=C2)[C@H]1CC1=CC2=C(OCO2)C=C1	0.378	0.546	0.566303	0.48387
12	4-Caffeoylquinic acid (Cryptochlorogenic acid)	O[C@@H]1CC(O)(C[C@@H](O)C1OC(=O)\C=C\C1=CC(O)=C(O)C=C1)C(O)=O	0.467	0.481	0.518602	0.483615
128	3`4`-dimethylether eriodictyol	COC1=C(O)C=CC(=C1)[C@@H]1CC(=O)C2=C(O1)C=C(O)C=C2O	0.5	0.491	0.439703	0.483432
86	α-hydroxy-butein	O\C(=C/C1=CC(O)=C(O)C=C1)C(=O)C1=CC=C(O)C=C1O	0.54	0.477	0.390076	0.483088
124	eriodictyol	OC1=CC(O)=C2C(=O)C[C@H](OC2=C1)C1=CC(O)=C(O)C=C1	0.517	0.476	0.430944	0.48246
45	luteolin 3´-O-methyl ether	COC1=CC(=CC=C1O)C1=CC(=O)C2=C(O)C=C(O)C=C2O1	0.472	0.518	0.436589	0.482114
50	isoetin	OC1=CC(O)=C2C(=O)C=C(OC2=C1)C1=CC(O)=C(O)C=C1O	0.531	0.462	0.425587	0.481425
130	luteolin-7,3`-dimethylether	COC1=C(O)C=CC(=C1)C1=CC(=O)C2=C(O1)C=C(O)C=C2O	0.472	0.525	0.420102	0.481245
65	cis-3-O-p-coumaroylquinic acid	O[C@@H]1C[C@@](O)(C[C@@H](OC(=O)\C=C\C2=CC=C(O)C=C2)[C@H]1O)C(O)=O	0.46	0.485	0.512475	0.481061
196	Eriodyctiol	OC1=CC(O)=C2C(=O)C[C@@H](OC2=C1)C1=CC(O)=C(O)C=C1	0.517	0.472	0.430782	0.480877
191	thujaplicatin methyl ether	[H][C@@]1(CC2=CC(OC)=C(O)C=C2)COC(=O)[C@@]1([H])CC1=CC(OC)=C(O)C(OC)=C1	0.339	0.571	0.578089	0.480655
14	4-Feruloylquinic acid	COC1=C(O)C=CC(\C=C\C(=O)OC2[C@H](O)CC(O)(C[C@H]2O)C(O)=O)=C1	0.445	0.488	0.532617	0.480652
294	(7S,8R,8′R)-7-(3,4-di_x0002_hydroxyphenyl)-3′,4′-dihydroxy-8'-(hydroxymethyl)-7,8,7′,8′-tetra_x0002_hydronaphthalen-8-carboxylic acid	OC[C@@H]1CC2=C(C=C(O)C(O)=C2)[C@@H]([C@H]1C(O)=O)C1=CC(O)=C(O)C=C1	0.437	0.491	0.536141	0.479409
127	3`-mono-eriodictyol	OC1=CC2=C(C(=O)C[C@H](O2)C2=CC(O)=C(O)C=C2)C(O)=C1	0.517	0.461	0.442395	0.479141
198	Quercetagetin	OC1=CC2=C(C(O)=C1O)C(=O)C(O)=C(O2)C1=CC(O)=C(O)C=C1	0.472	0.504	0.447383	0.47904
88	quercetin 3-O-glucopyranosyl	OC[C@@H]1O[C@H](OC2=C(OC3=CC(O)=CC(O)=C3C2=O)C2=CC=C(O)C(O)=C2)[C@@H](O)[C@H](O)[C@H]1O	0.487	0.422	0.560008	0.477693
214	isovitexin	OC[C@H]1O[C@H]([C@H](O)[C@@H](O)[C@@H]1O)C1=C(O)C2=C(OC(=CC2=O)C2=CC=C(O)C=C2)C=C1O	0.512	0.482	0.403246	0.476791
41	luteolin 4´-O-methyl ether	COC1=CC=C(C=C1O)C1=CC(=O)C2=C(O1)C=C(O)C=C2O	0.474	0.51	0.422479	0.476749
223	Dihydroquercetin	OC1C(OC2=CC(O)=CC(O)=C2C1=O)C1=CC(O)=C(O)C=C1	0.484	0.484	0.448331	0.476259
72	3,7,4´-trihydroxyflavanone (garbanzol)	O[C@@H]1[C@H](OC2=C(C=CC(O)=C2)C1=O)C1=CC=C(O)C=C1	0.459	0.549	0.373854	0.475346
205	auraptene	[H]C1=C2OC(=O)C=CC2=CC=C1OC\C=C(/C)CCCC(C)=C	0.494	0.484	0.419309	0.473922
40	Luteolin	OC1=CC(O)=C2C(=O)C=C(OC2=C1)C1=CC(O)=C(O)C=C1	0.506	0.472	0.412964	0.472654
24	Caffeoyl–feruloyltartaric acid	COC1=C(O)C=CC(\C=C\C(=O)C(O)(C(O)=O)C(O)(C(O)=O)C(=O)\C=C\C2=CC(O)=C(O)C=C2)=C1	0.509	0.393	0.546571	0.472269
117	fertaric acid	COC1=C(O)C=CC(\C=C\C(=O)OC(C(O)C(O)=O)C(O)=O)=C1	0.5	0.438	0.482718	0.472259
11	1-Caffeoylquinic acid	O[C@@H]1CC(C[C@@H](O)C1O)(OC(=O)\C=C\C1=CC(O)=C(O)C=C1)C(O)=O	0.464	0.47	0.490712	0.472119
268	Taxifolin	O[C@@H]1[C@H](OC2=CC(O)=CC(O)=C2C1=O)C1=CC(O)=C(O)C=C1	0.484	0.468	0.452532	0.47098
136	6-hydroxyluteolin	OC1=C(O)C=C(C=C1)C1=CC(=O)C2=C(O)C(O)=C(O)C=C2O1	0.496	0.458	0.447247	0.470716
64	trans-3-O-p-coumaroylquinic acid	O[C@H]1C[C@@](O)(C[C@H](OC(=O)\C=C\C2=CC=C(O)C=C2)[C@H]1O)C(O)=O	0.46	0.489	0.45174	0.469429
200	Chrysoeriol	COC1=C(O)C=CC(=C1)C1=CC(=O)C2=C(O)C=C(O)C=C2O1	0.472	0.484	0.438389	0.469349
95	4-O-p-Coumaroylquinic acid	O[C@@H]1CC(O)(C[C@@H](O)C1OC(=O)\C=C\C1=CC=C(O)C=C1)C(O)=O	0.457	0.486	0.459424	0.468747
13	3-Feruloylquinic acid	COC1=C(O)C=CC(\C=C\C(=O)O[C@@H]2C[C@](O)(C[C@@H](O)[C@@H]2O)C(O)=O)=C1	0.443	0.489	0.476831	0.468141
172	4-Acetyl-3-prenyl-ethoxycinnamate	[H]C1=C(OC(C)=C)C(CC=C(C)C)=CC(\C=C\C(=O)OCC)=C1	0.465	0.464	0.472025	0.466138
152	Patuletin-7-O-glucoside	COC1=C(O[C@@H]2O[C@H](CO)[C@@H](O)[C@H](O)[C@H]2O)C=C2OC(=C(O)C(=O)C2=C1O)C1=CC=C(O)C(O)=C1	0.495	0.322	0.666943	0.465374
272	mearnsetin	COC1=C(O)C=C(C=C1O)C1=C(O)C(=O)C2=C(O)C=C(O)C=C2O1	0.433	0.507	0.443617	0.463937
116	coutaric acid	OC(C(OC(=O)\C=C\C1=CC=C(O)C=C1)C(O)=O)C(O)=O	0.51	0.423	0.449842	0.463281
121	Myricetin	OC1=CC(O)=C2C(OC(=C(O)C2=O)C2=CC(O)=C(O)C(O)=C2)=C1	0.472	0.452	0.462646	0.462231
259	dihydrokaempferide	COC1=CC=C(C=C1)C1OC2=CC(O)=CC(O)=C2C(=O)C1O	0.448	0.481	0.449004	0.460987
278	5,6,7-trihydroxy-4´-methoxyflavone	COC1=CC=C(C=C1)C1=CC(=O)C2=C(O1)C=C(O)C(O)=C2O	0.458	0.486	0.417078	0.459953
173	3,5-Diprenyl-4-hydroxycinnamic acid	CC(C)=CCC1=CC(\C=C\C(O)=O)=CC(CC=C(C)C)=C1O	0.417	0.474	0.512447	0.459769
15	5-p-Coumaroylquinic acid	O[C@@H]1C[C@](O)(C[C@@H](OC(=O)\C=C\C2=CC=C(O)C=C2)[C@@H]1O)C(O)=O	0.46	0.486	0.411576	0.459552
245	3-O-methylquercetin	[H]C1=C(O)C=C(C=C1)C1=C(OC)C(=O)C2=C(O)C([H])=C(O)C(O)=C2O1	0.395	0.51	0.478656	0.457652
175	3-Prenyl-4-(4_x0002_ -hydroxydihydrocinnamoyloxy)-cinnamate	CC(C)=CCC1=CC(\C=C\C(O)=O)=CC=C1OC(=O)CCC1=CC=C(O)C=C1	0.523	0.309	0.597824	0.456434
179	5,7,4_x0002_ -Trihydroxy-6-methoxyflavone	[H]C1=C(O)C=CC(=C1)C1=C([H])C(=O)C2=C(O1)C([H])=C(O)C(OC)=C2O	0.42	0.53	0.386802	0.455359
217	Z-2-β-d-glucopyranosyloxy-4-methoxycinnamic acid	COC1=CC(O[C@H]2O[C@@H](CO)[C@H](O)[C@@H](O)[C@@H]2O)=C(\C=C\C(O)=O)C=C1	0.421	0.435	0.552354	0.454923
100	(S)-2',5,7,-trihydroxyflavanone	[H][C@@]1(CC(=O)C2=C(O)C=C(O)C=C2O1)C1=CC=CC=C1O	0.503	0.456	0.364908	0.454846
33	apigenin	OC1=CC=C(C=C1)C1=CC(=O)C2=C(O)C=C(O)C=C2O1	0.496	0.476	0.338421	0.454064
218	E-2-β-d-glucopyranosyloxy-4-methoxycinnamic acid	COC1=CC(O[C@H]2O[C@@H](CO)[C@H](O)[C@@H](O)[C@@H]2O)=C(\C=C/C(O)=O)C=C1	0.421	0.418	0.578526	0.454025
240	4,6-dihydroxy-3-[3′-methyl-2′-butenyl]-5-[4″-hydroxy-3″-methyl-2″-butenyl]-cinnamic acid	CC(C)=CCC1=C(O)C(C\C=C(/C)CO)=C(O)C(\C=C\C(O)=O)=C1	0.356	0.463	0.609753	0.45247
301	β-methylcubebin	[H][C@]1(CC2=CC3=C(OCO3)C=C2)CO[C@H](OC)[C@]1([H])CC1=CC2=C(OCO2)C=C1	0.396	0.491	0.485927	0.452274
249	3-Caffeoylshikimic acid	O[C@@H]1CC(=C[C@@H](OC(=O)\C=C\C2=CC(O)=C(O)C=C2)[C@H]1O)C(O)=O	0.508	0.375	0.487486	0.452086
122	hispidulin	COC1=C(O)C2=C(OC(=CC2=O)C2=CC=C(O)C=C2)C=C1O	0.42	0.522	0.380304	0.450853
126	Eupafolin	COC1=C(O)C2=C(OC(=CC2=O)C2=CC(O)=C(O)C=C2)C=C1O	0.437	0.475	0.428603	0.449881
55	quercetin	OC1=CC(O)=C2C(OC(=C(O)C2=O)C2=CC(O)=C(O)C=C2)=C1	0.463	0.463	0.402489	0.449868
167	Daphnin	OC[C@H]1O[C@@H](OC2=C(O)C3=C(C=CC(=O)O3)C=C2)[C@H](O)[C@@H](O)[C@@H]1O	0.492	0.346	0.558023	0.449835
90	Pinostrobin chalcone	COC1=CC(O)=C(C(=O)\C=C\C2=CC=CC=C2)C(O)=C1	0.494	0.467	0.332609	0.448529
209	Aromadendrin	O[C@@H]1[C@H](OC2=CC(O)=CC(O)=C2C1=O)C1=CC=C(O)C=C1	0.464	0.452	0.414089	0.448525
277	4´-methyl ether of gossypetin	COC1=C(O)C=C(C=C1)C1=C(O)C(=O)C2=C(O1)C(O)=C(O)C=C2O	0.437	0.438	0.484792	0.447759
81	Patuletin	COC1=C(O)C2=C(OC(=C(O)C2=O)C2=CC(O)=C(O)C=C2)C=C1O	0.439	0.457	0.446824	0.447663
74	Naringenin	OC1=CC=C(C=C1)C1CC(=O)C2=C(O)C=C(O)C=C2O1	0.488	0.433	0.398239	0.447239
231	Techtochrysin	COC1=CC(O)=C2C(=O)C=C(OC2=C1)C1=CC=CC=C1	0.399	0.541	0.365445	0.446663
296	Diasesartemin	COC1=CC(=CC2=C1OCO2)[C@@H]1OC[C@H]2[C@@H]1CO[C@H]2C1=CC(OC)=C(OC)C(OC)=C1	0.396	0.423	0.581204	0.446639
244	pinobanksin	O[C@@H]1C(OC2=CC(O)=CC(O)=C2C1=O)C1=CC=CC=C1	0.424	0.498	0.393013	0.445909
254	capillartemisin A	CC(C)=CCC1=C(O)C(C\C=C(/C)CO)=CC(\C=C\C(O)=O)=C1	0.361	0.497	0.505275	0.444933
236	Fisetin hydrate	OC1=CC2=C(C=C1)C(=O)C(O)=C(O2)C1=CC(O)=C(O)C=C1	0.504	0.419	0.377293	0.443613
125	5,6,7-trihydroxy-40 -methoxyflavanone	COC1=CC=C(C=C1)C1=C(O)C(=O)C2=C(O1)C=C(O)C(O)=C2O	0.418	0.479	0.419672	0.441966
115	1-methyl-2-phenylethyl isoferulate	COC1=CC(\C=C\C(=O)OCCC2=CC=CC=C2)=CC=C1O	0.459	0.426	0.42831	0.439571
289	fargesin	COC1=C(OC)C=C(C=C1)[C@@H]1OC[C@H]2[C@@H]1CO[C@@H]2C1=CC2=C(OCO2)C=C1	0.387	0.439	0.533492	0.438911
286	epieudesmin	COC1=C(OC)C=C(C=C1)[C@H]1OC[C@H]2[C@@H]1CO[C@H]2C1=CC(OC)=C(OC)C=C1	0.407	0.409	0.547531	0.438271
261	violanone	CCC1=C(O)C(OC)=C(C=C1)C1COC2=C(C=CC(O)=C2)C1=O	0.362	0.512	0.44499	0.43805
300	α-methylcubebin	[H][C@]1(CC2=CC3=C(OCO3)C=C2)CO[C@@H](OC)[C@]1([H])CC1=CC2=C(OCO2)C=C1	0.396	0.442	0.505477	0.437557
299	β-cubebin	[H][C@]1(CC2=CC3=C(OCO3)C=C2)CO[C@H](O)[C@]1([H])CC1=CC2=C(OCO2)C=C1	0.403	0.441	0.492626	0.437154
310	trachelogenin	COC1=C(O)C=CC(C[C@]2(O)[C@@H](CC3=CC(OC)=C(OC)C=C3)COC2=O)=C1	0.366	0.501	0.450281	0.436526
70	5,4´-Dihydroxy-7-methoxyflavone	COC1=CC(O)=C2C(=O)C=C(OC2=C1)C1=CC=C(O)C=C1	0.418	0.49	0.369183	0.435265
211	(E)-3-(4-(3-methylbut-2-enyloxy)-3,5-dime-thoxyphenyl)acrylaldehyde	[H]C(=O)\C=C\C1=CC(OC)=C(OCCC(C)=C)C(OC)=C1	0.311	0.537	0.475577	0.434163
118	caftaric acid glycoside	OCC1OC(OC2=C(O)C=C(\C=C\C(=O)OC(C(O)C(O)=O)C(O)=O)C=C2)C(O)C(O)C1O	0.452	0.309	0.624549	0.434114
265	biochanin A	[H]OC1=CC(O[H])=C2C(=O)C(=COC2=C1)C1=CC=C(OC)C=C1	0.414	0.508	0.331916	0.432559
263	drupanin	CC(C)=CCC1=C(O)C=CC(\C=C\C(O)=O)=C1	0.394	0.48	0.417197	0.432311
137	Rhamnetin	COC1=CC(O)=C2C(=O)C(O)=C(OC2=C1)C1=CC=C(O)C(O)=C1	0.411	0.467	0.408903	0.432213
293	7-(3,4-dihydroxyphenyl)-3′,4′-dihy_x0002_droxy-7,8,7′,8′-tetrahydronaphtho [8,8′-c]furan-1(3H)-one	OC1=CC2=C(C=C1O)[C@@H]([C@@H]1[C@H](COC1=O)C2)C1=CC(O)=C(O)C=C1	0.398	0.411	0.531904	0.432089
69	Chrysin	OC1=CC(O)=C2C(=O)C=C(OC2=C1)C1=CC=CC=C1	0.441	0.468	0.350902	0.431895
212	nelumal A	[H]C(=O)\C=C\C1=CC(OC)=C(OC\C([H])=C(/C)CCC=C(C)C)C(OC)=C1	0.42	0.352	0.592871	0.431204
159	aromaden-drin-4′-methyl ether	COC1=CC=C(C=C1)C1OC2=CC(OC3OC(C)C(O)C(O)C3O)=CC(O)=C2C(=O)C1O	0.454	0.324	0.580713	0.431197
77	Pinobanksin	O[C@@H]1[C@H](OC2=CC(O)=CC(O)=C2C1=O)C1=CC=CC=C1	0.424	0.454	0.393418	0.428971
107	5,7-dihydroxy-4´-methoxyflavone	COC1=CC=C(C=C1)C1=CC(=O)C2=C(O)C=C(O)C=C2O1	0.444	0.423	0.41174	0.428874
148	4-hydroxylonchocarpin	CC1(C)OC2=C(C=C1)C(O)=C(C=C2)C(=O)\C=C\C1=CC=C(O)C=C1	0.487	0.385	0.394471	0.427453
264	vestitone	COC1=CC(O)=C(C=C1)[C@@H]1COC2=C(C=CC(O)=C2)C1=O	0.46	0.439	0.344932	0.426903
276	6-hydroxy-3´,4´,5´- trimethoxyflavone	COC1=CC(OC)=C(OC)C(=C1)C1=CC(=O)C2=C(O1)C=CC(O)=C2	0.387	0.489	0.385096	0.426054
56	quercetin 3´-methyl ether (isorhamnetin)	COC1=C(O)C=CC(=C1)C1=C(O)C(=O)C2=C(O)C=C(O)C=C2O1	0.433	0.419	0.421385	0.425062
230	3,4-dimethoxy cinnamic acid	COC1=C(OC)C=C(\C=C\C(O)=O)C=C1	0.323	0.573	0.344164	0.424327
104	(S)-4',5-dihydroxy-7-methoxyflavanone (sakuranetin)	COC1=CC(O)=C2C(=O)CC(OC2=C1)C1=CC=C(O)C=C1	0.439	0.427	0.388681	0.423437
54	kaempferol 3´-methyl ether	COC1=C(OC2=CC(O)=CC(O)=C2C1=O)C1=CC=C(O)C=C1	0.376	0.495	0.378977	0.422691
290	sesartemin	COC1=CC(=CC2=C1OCO2)[C@H]1OC[C@H]2[C@@H]1CO[C@@H]2C1=CC(OC)=C(OC)C(OC)=C1	0.396	0.452	0.416144	0.42204
178	5-Desmethyltangeretin	[H]C1=C(OC)C=CC(=C1)C1=C([H])C(=O)C2=C(O1)C(OC)=C(OC)C(OC)=C2O	0.36	0.509	0.378418	0.42165
180	5,7,4_x0002_ -Trihydroxy-6,3_x0002_ -dimethoxyflavone	[H]C1=C(OC2=C(C(O)=C(OC)C(O)=C2[H])C1=O)C1=CC(OC)=C(O)C=C1	0.359	0.476	0.437594	0.421327
134	luteolin-7,3`,4`-trimethylether	COC1=CC2=C(C(O)=C1)C(=O)C=C(O2)C1=CC(OC)=C(OC)C=C1	0.367	0.463	0.430356	0.417895
80	Resokaempferol	OC1=CC=C(C=C1)C1=C(O)C(=O)C2=C(O1)C=C(O)C=C2	0.465	0.419	0.328679	0.417617
303	β-methylclusin	[H][C@]1(CC2=CC3=C(OCO3)C=C2)CO[C@H](OC)[C@]1([H])CC1=CC(OC)=C(OC)C(OC)=C1	0.381	0.409	0.490856	0.415675
210	Ellagic acid	OC1=C(O)C2=C3C(=C1)C(=O)OC1=C3C(=CC(O)=C1O)C(=O)O2	0.513	0.322	0.404713	0.415596
131	quercetin7,3`-dimethylether	COC1=CC2=C(C(O)=C1)C(=O)C=C(O2)C1=CC(OC)=C(O)C=C1	0.374	0.461	0.4101	0.415498
162	Dihydroxy-dimethoxyflavone	COC1=C(OC)C=C(C=C1)C1=CC(=O)C2=C(O)C=C(O)C=C2O1	0.395	0.428	0.429344	0.415222
298	α-cubebin	[H][C@]1(CC2=CC3=C(OCO3)C=C2)CO[C@@H](O)[C@]1([H])CC1=CC2=C(OCO2)C=C1	0.403	0.387	0.484883	0.414579
275	6-hydroxy-2´,4´,5´-trimethoxyflavone	COC1=C(OC)C(=C(OC)C=C1)C1=CC(=O)C2=C(O1)C=CC(O)=C2	0.36	0.471	0.411344	0.414092
79	Kaempferol	OC1=CC=C(C=C1)C1=C(O)C(=O)C2=C(O)C=C(O)C=C2O1	0.443	0.416	0.355749	0.413618
219	Pilloin	COC1=CC(O)=C2C(=O)C=C(OC2=C1)C1=CC(O)=C(OC)C=C1	0.39	0.413	0.448756	0.41165
302	α-methylclusin	[H][C@]1(CC2=CC3=C(OCO3)C=C2)CO[C@@H](OC)[C@]1([H])CC1=CC(OC)=C(OC)C(OC)=C1	0.381	0.388	0.507151	0.411085
76	Pinostrobin	COC1=CC(O)=C2C(=O)C[C@H](OC2=C1)C1=CC=CC=C1	0.412	0.425	0.380693	0.410236
132	taxifolin-3`-methylether	COC1=CC2=C(C(O)=C1)C(=O)C(O)=C(O2)C1=CC(OC)=C(O)C=C1	0.373	0.423	0.453169	0.409745
271	cirsiliol	COC1=C(OC)C(O)=C2C(=O)C=C(OC2=C1)C1=CC(O)=C(O)C=C1	0.366	0.452	0.411794	0.409214
184	Nivetin	COC1=CC=C(C=C1)C1=CC(=O)OC2=C1C(O)=CC(O)=C2	0.377	0.472	0.352336	0.408406
297	Epiyangambin	COC1=CC(=CC(OC)=C1OC)[C@H]1OC[C@H]2[C@@H]1CO[C@H]2C1=CC(OC)=C(OC)C(OC)=C1	0.429	0.38	0.419867	0.408058
102	(S)-5-hydroxy-7-methoxyflavanone	COC1=CC(O)=C2C(=O)CC(OC2=C1)C1=CC=CC=C1	0.412	0.425	0.360502	0.405854
149	kanzonol B	CC1(C)CCC2=CC(\C=C\C(=O)C3=C(O)C=C(O)C=C3)=CC=C2O1	0.438	0.382	0.389678	0.405845
177	Nevadensin	[H]C1=C(OC)C=CC(=C1)C1=C([H])C(=O)C2=C(O1)C(OC)=C(O)C(OC)=C2O	0.342	0.464	0.414491	0.404938
129	luteolin-3`-mono	COC1=C(OC)C=C(C=C1)C1=CC(=O)C2=C(O1)C=C(O)C=C2O	0.395	0.408	0.414815	0.40433
270	eupatorin	COC1=C(O)C=C(C=C1)C1=CC(=O)C2=C(O)C(OC)=C(OC)C=C2O1	0.339	0.461	0.422342	0.404293
78	Galangin	OC1=CC(O)=C2C(OC(=C(O)C2=O)C2=CC=CC=C2)=C1	0.435	0.409	0.328393	0.401804
98	(E)-2',4'-dihydroxychalcone	OC1=CC(O)=C(C=C1)C(=O)CCC1=CC=CC=C1	0.405	0.434	0.338258	0.401737
36	apigenin 7,4´-O-dimethyl ether	COC1=CC=C(C=C1)C1=CC(=O)C2=C(O)C=C(OC)C=C2O1	0.375	0.435	0.390707	0.401625
273	axillarin	COC1=C(O)C=C2OC(=C(OC)C(=O)C2=C1O)C1=CC(O)=C(O)C(O)=C1	0.428	0.322	0.494691	0.401458
260	pratensein	COC1=C(O)C=C(C=C1)C1=COC2=CC(O)=CC(O)=C2C1=O	0.431	0.377	0.378803	0.398778
101	(S)-5,7-dihydroxy-2'-methoxyflavanone	COC1=C(C=CC=C1)C1CC(=O)C2=C(O)C=C(O)C=C2O1	0.456	0.33	0.409906	0.397243
114	methyl ferulic acid prenyl ester	COC1=CC=C(\C=C\C(=O)OCC=C(C)C)C=C1OC	0.397	0.387	0.408861	0.395705
110	caffeic acid methyl ester	COC(=O)\C=C\C1=CC=C(O)C(O)=C1	0.412	0.406	0.339574	0.393961
153	Methyl chavicol	COC1=CC=C(CC=C)C=C1	0.361	0.487	0.284615	0.393177
288	pinoresinol	COC1=C(O)C=CC(=C1)[C@H]1OC[C@H]2[C@@H]1CO[C@@H]2C1=CC(OC)=C(O)C=C1	0.345	0.4	0.459675	0.391168
287	kobusin	COC1=C(OC)C=C(C=C1)[C@H]1OC[C@H]2[C@@H]1CO[C@@H]2C1=CC2=C(OCO2)C=C1	0.387	0.349	0.471231	0.390576
75	Pinocembrin	OC1=CC(O)=C2C(=O)C[C@H](OC2=C1)C1=CC=CC=C1	0.443	0.344	0.375725	0.390094
228	Diosmetin	COC1=C(O)C=C(C=C1)C1=CC(=O)C2=C(O)C=C(O)C=C2O1	0.474	0.277	0.438402	0.390048
105	(S)-4',5-dihydroxy-3',7-dimethoxyflavanone (eriodictyol-3',7-dimethyl ether)	COC1=CC(O)=C2C(=O)C(=COC2=C1)C1=CC(OC)=C(O)C=C1	0.315	0.478	0.365023	0.388926
269	cirsimaritin	COC1=C(OC)C(O)=C2C(=O)C=C(OC2=C1)C1=CC=C(O)C=C1	0.354	0.44	0.360025	0.388584
85	ethyl caffeate	CCOC(=O)\C=C\C1=CC(O)=C(O)C=C1	0.404	0.386	0.363056	0.38815
182	cycloethulia-coumarin	CC1=CC=CC2=C1C1=C(C(=O)O2)[C@](C)(C[C@@]2(OCC3(C)OC23)O1)C=C	0.283	0.476	0.411256	0.385512
111	ferulic acid methyl ester	COC(=O)\C=C\C1=CC=C(O)C(OC)=C1	0.359	0.421	0.365429	0.384385
99	(S)-7-hydroxyflavanone	OC1=CC=C2C(=O)C[C@H](OC2=C1)C1=CC=CC=C1	0.43	0.368	0.327892	0.383851
133	quercetin3,7,30 ,40 -tetramethylether	COC1=CC2=C(C(O)=C1)C(=O)C(OC)=C(O2)C1=CC(OC)=C(OC)C=C1	0.327	0.424	0.410955	0.382752
112	ferulic acid ethyl ester	CCOC(=O)\C=C\C1=CC=C(O)C(OC)=C1	0.364	0.399	0.38096	0.381223
274	Aesculetin	OC1=C(O)C=C2C=CC(=O)OC2=C1	0.412	0.398	0.292657	0.380684
262	formononetin	COC1=CC=C(C=C1)C1=COC2=C(C=CC(O)=C2)C1=O	0.453	0.345	0.301894	0.378419
113	ferulic acid prenyl ester	COC1=CC(\C=C\C(=O)OCC=C(C)C)=CC=C1O	0.37	0.356	0.421796	0.375823
183	Nivegin	OC1=CC=C(C=C1)C1=CC(=O)OC2=C1C(O)=CC(O)=C2	0.424	0.369	0.296997	0.375157
73	3-Methyl-galangin	COC1=C(OC2=CC(O)=CC(O)=C2C1=O)C1=CC=CC=C1	0.347	0.422	0.323986	0.371026
215	jaceosidin	COC1=C(O)C=CC(=C1)C1=CC(=O)C2=C(O1)C=C(O)C(OC)=C2O	0.359	0.341	0.440347	0.369689
176	Trans-Ferulic acid O-hexan-3-onyl-ether	CCCC(=O)CCOC1=CC=C(\C=C\C(O)=O)C=C1OC	0.34	0.331	0.48718	0.368458
190	arctigenin	[H]C1=C(O)C(OC)=CC(C[C@]2([H])C(=O)OC[C@@]2([H])CC2=CC(OC)=C(OC)C=C2)=C1	0.337	0.336	0.474451	0.366442
220	Retusin	COC1=CC(O)=C2C(=O)C(OC)=C(OC2=C1)C1=CC(OC)=C(OC)C=C1	0.327	0.364	0.425406	0.362672
170	3-Prenyl-4-hydroxycinnamic acid	[H]C1=C(O)C(CC=C(C)C)=CC(\C=C\C(O)=O)=C1	0.394	0.306	0.398929	0.361019
138	Eupatilin	COC1=C(OC)C=C(C=C1)C1=CC(=O)C2=C(O)C(OC)=C(O)C=C2O1	0.353	0.339	0.41173	0.360328
120	7-Methoxycoumarin	[H]C1=C(OC)C=C2OC(=O)C([H])=C([H])C2=C1	0.385	0.385	0.259042	0.357665
216	Coniferyl aldehyde	COC1=CC(\C=C\C=O)=CC=C1O	0.303	0.421	0.333185	0.355209
119	7-Isopentenyloxycoumarin	[H]C1=C(OC=C(C)C)C=C2OC(=O)C([H])=C([H])C2=C1	0.436	0.295	0.310277	0.354158
168	Daphnetin	OC1=C(O)C2=C(C=CC(=O)O2)C=C1	0.385	0.351	0.301424	0.353707
189	matairesinol	[H]C1=C(O)C(OC)=CC(C[C@]2([H])C(=O)OC[C@@]2([H])CC2=CC(OC)=C(O)C=C2)=C1	0.33	0.292	0.505915	0.353473
93	Nutanocumarin	C[C@H]1OC2=C(C(=O)OC3=C2C(C)=CC(O)=C3)[C@]1(C)CC\C=C(\C)CO	0.286	0.347	0.484912	0.35277
106	6,7-dimethoxycoumarin	COC1=C(OC)C=C2C=CC(=O)OC2=C1	0.316	0.426	0.282663	0.351328
295	dillapiol	COC1=C(OC)C(CC=C)=CC2=C1OCO2	0.298	0.408	0.340066	0.349692
82	Quercetin-7,3',4'-trimethyl ether	COC1=CC(O)=C2C(=O)C(O)=C(OC2=C1)C1=CC(OC)=C(OC)C=C1	0.335	0.321	0.422366	0.348543
108	5,7-dihydroxy-4´,6-dimethoxyflavone	COC1=CC=C(C=C1)C1=CC(=O)C2=C(O)C(OC)=C(O)C=C2O1	0.347	0.34	0.364368	0.348061
2	trans-caffeic acid	OC(=O)\C=C\C1=CC(O)=C(O)C=C1	0.387	0.31	0.325528	0.343866
109	cinnamic acid methyl ester	[H]C1=CC=C(\C=C\C(=O)OC)C=C1[H]	0.449	0.281	0.258662	0.342689
123	santin	COC1=CC=C(C=C1)C1=C(OC)C(=O)C2=C(O1)C=C(O)C(OC)=C2O	0.321	0.344	0.378259	0.342325
135	quercetin-7,3`,4`-trimethyl ether	COC1=CC2=C(C(O)=C1)C(=O)C(O)=C(O2)C1=CC(OC)=C(OC)C=C1	0.335	0.311	0.409232	0.341823
25	p-coumaric acid	OC(=O)\C=C\C1=CC=C(O)C=C1	0.433	0.279	0.279693	0.340142
58	o-coumaric acid	OC(=O)\C=C\C1=CC=CC=C1O	0.383	0.321	0.281374	0.336956
169	Herniarin	COC1=CC2=C(C=CC(=O)O2)C=C1	0.385	0.325	0.267833	0.336357
26	sinapic acid	COC1=CC(\C=C\C(O)=O)=CC(OC)=C1O	0.295	0.334	0.414976	0.336127
1	cis-caffeic acid	OC(=O)\C=C/C1=CC(O)=C(O)C=C1	0.387	0.308	0.28829	0.335011
3	cis-ferulic acid	COC1=C(O)C=CC(\C=C/C(O)=O)=C1	0.338	0.314	0.310803	0.322811
91	Umbeliferone	OC1=CC=C2C=CC(=O)OC2=C1	0.416	0.264	0.254321	0.322099
181	5,7,4_x0002_ -Trihydroxy-6,8-dimethoxyflavone	[H]C1=C(O)C=CC(=C1)C1=C([H])C(=O)C2=C(O1)C(OC)=C(O)C(OC)=C2O	0.352	0.252	0.387821	0.32108
29	umbelliferone	OC1=CC2=C(C=C1)C=CC(=O)O2	0.416	0.267	0.24042	0.320243
32	scopoletin	COC1=C(O)C=C2OC(=O)C=CC2=C1	0.339	0.296	0.323064	0.318904
59	hesperetic acid	COC1=C(O)C=C(\C=C\C(O)=O)C=C1	0.386	0.241	0.314353	0.314346
4	trans-ferulic acid	COC1=C(O)C=CC(\C=C\C(O)=O)=C1	0.338	0.259	0.327233	0.305096
60	methoxycinnamic acid	COC(=CC1=CC=CC=C1)C(O)=O	0.347	0.249	0.256669	0.289477
229	m-methoxy cinnamic acid	COC1=CC=CC(\C=C\C(O)=O)=C1	0.376	0.163	0.315025	0.28035

## Sheet: Table S2
Structure	237	306	308
LogS	-4.493	-5.171	-4.281
LogD	1.209	3.854	3.184
LogP	1.834	6.207	3.686
Pgp-inh	0	0.999	0.899
Pgp-sub	0.007	0.115	0.008
HIA	0.185	0.002	0.005
F(20%)	0.004	0.003	0.003
F(30%)	0.824	0.123	0.011
Caco-2	-6.174	-5.26	-4.93
MDCK	5.53691e-06	4.33203e-05	1.15624e-05
BBB	0.025	0.003	0.031
PPB	0.922551	0.817739	0.935479
VDss	0.432	0.395	0.438
Fu	0.0439315	0.0997135	0.0583338
CYP1A2-inh	0.065	0.062	0.072
CYP1A2-sub	0.012	0.817	0.613
CYP2C19-inh	0.038	0.566	0.398
CYP2C19-sub	0.029	0.8	0.698
CYP2C9-inh	0.629	0.924	0.887
CYP2C9-sub	0.991	0.792	0.753
CYP2D6-inh	0.055	0.008	0.132
CYP2D6-sub	0.138	0.936	0.832
CYP3A4-inh	0.081	0.955	0.833
CYP3A4-sub	0.015	0.929	0.918
CL	6.583	11.283	12.235
T12	0.952	0.716	0.585
hERG	0.007	0.212	0.175
H-HT	0.6	0.138	0.203
DILI	0.977	0.934	0.842
Ames	0.07	0.044	0.046
ROA	0.839	0.027	0.391
FDAMDD	0.007	0.855	0.877
SkinSen	0.941	0.961	0.928
Carcinogenicity	0.317	0.033	0.043
EC	0.003	0.003	0.003
EI	0.907	0.051	0.073
Respiratory	0.013	0.336	0.131
BCF	0.671	1.407	1.824
IGC50	4.596	5.537	5.166
LC50	5.526	6.47	7.159
LC50DM	6.029	7.435	7.053
NR-AR	0.03	0.393	0.508
NR-AR-LBD	0.647	0.085	0.159
NR-AhR	0.443	0.597	0.635
NR-Aromatase	0.187	0.587	0.55
NR-ER	0.742	0.319	0.476
NR-ER-LBD	0.618	0.046	0.013
NR-PPAR-gamma	0.6	0.759	0.818
SR-ARE	0.161	0.84	0.553
SR-ATAD5	0.093	0.776	0.596
SR-HSE	0.311	0.337	0.318
SR-MMP	0.225	0.888	0.914
SR-p53	0.462	0.953	0.845
MW	538.11	742.3	536.2
Vol	512.531	752.221	537.401
Dense	1.05	0.987	0.998
nHA	12	12	9
nHD	7	2	3
TPSA	211.28	148.44	123.91
nRot	9	15	9
nRing	4	6	5
MaxRing	9	6	9
nHet	12	12	9
fChar	0	0	0
nRig	26	36	28
Flex	0.346	0.417	0.321
nStereo	3	4	4
NonGenotoxic_Carcinogenicity	1	0	0
LD50_oral	0	0	0
Genotoxic_Carcinogenicity_Mutagenicity	1	0	0
SureChEMBL	0	0	0
NonBiodegradable	1	1	0
Skin_Sensitization	11	6	5
Acute_Aquatic_Toxicity	3	2	4
Toxicophores	3	1	1
QED	0.125	0.138	0.349
Synth	4.025	4.287	4.062
Fsp3	0.148	0.381	0.367
MCE-18	87.613	121.862	97.317
Natural	1.36	0.748	1.73
Product-likeness	3	3	3
Alarm_NMR	1	0	0
BMS	2	1	1
Chelating	1	0	0
PAINS	Rejected	Rejected	Accepted
Lipinski	Accepted	Accepted	Accepted
Pfizer	Rejected	Rejected	Rejected
GSK	Rejected	Rejected	Rejected
cLogP	2.2492	5.6926	3.9951
cLogS	-3.239	-7.112	-4.347
Druglikeness	-3.5203	0.39139	0.43338
Mutagenic	none	none	none
Tumorigenic	none	none	none
Reproductive Effective	none	none	none
Irritant	none	none	none
